# Supplementary material for: Methodological Aspects of Green Extraction of Usnic Acid Using Natural Deep Eutectic Solvents
Source: MDPI journal article supplement (doi:10.3390/molecules28145321), 2023-07-10
Supplement: s1 [file s1]

## Article

# Methodological Aspects of Green Extraction of Usnic Acid Using Natural Deep Eutectic Solvents

Magdalena Kulinowska <sup>1</sup>, Sławomir Dresler <sup>1,2</sup>, Agnieszka Skalska-Kamińska<sup>1</sup>, Agnieszka Hanaka<sup>2</sup>, and Maciej Strzemiński<sup>1,\*</sup>

<sup>1</sup> Department of Analytical Chemistry, Medical University of Lublin, 20-093 Lublin, Poland

<sup>2</sup> Department of Plant Physiology and Biophysics, Institute of Biological Sciences, Maria Curie-Skłodowska University, 20-033 Lublin, Poland

\* Correspondence: maciej.strzemiński@umlub.pl

**Table S1.** Usnic acid solubility in hydrophilic NADES at 20°C.

| Natural Deep Eutectic Solvents            | Molar ratio | Solubility (mg/100 ml) |
|-------------------------------------------|-------------|------------------------|
| <b>Proline-based</b>                      |             |                        |
| Proline : urea                            | 1:1         | 13.30                  |
| Proline : levulinic acid                  | 1:2         | 9.28                   |
| Proline : glycerol : saccharose           | 4:1:1       | 5.77                   |
| Proline : glycerol : saccharose           | 4:3:1       | 2.68                   |
| Proline : glycerol : saccharose           | 4:5:1       | 4.31                   |
| Proline : glycerol : saccharose           | 4:7:1       | 2.82                   |
| Proline : glycerol : saccharose           | 4:9:1       | 2.82                   |
| Proline : glycerol : saccharose           | 4:11:1      | 3.19                   |
| Proline : glycerol : saccharose           | 4:13:1      | 2.05                   |
| Proline : glycerol                        | 1:1         | 4.59                   |
| Proline : glucose                         | 1:1         | 2.90                   |
| Proline : tartaric acid : citric acid     | 1:1:1       | 1.85                   |
| Proline : fructose                        | 1:1         | 1.31                   |
| Proline : citric acid                     | 1:1         | 0.44                   |
| Proline : citric acid                     | 1:2         | 0.34                   |
| <b>Urea-based</b>                         |             |                        |
| Urea : choline chloride                   | 2:1         | 9.57                   |
| Urea : glycerol : citric acid             | 1:2:1       | 1.45                   |
| Urea : glycerol : citric acid             | 1:3:1       | 2.70                   |
| Urea : choline chloride : levulinic acid  | 1:1:1       | 0.74                   |
| <b>Betaine-based</b>                      |             |                        |
| Betaine : glycerol                        | 1:2         | 5.01                   |
| Betaine : levulinic acid                  | 1:2         | 3.74                   |
| Betaine : saccharose                      | 4:1         | 1.22                   |
| Betaine : lactic acid : water             | 1:1.8:1     | 0.56                   |
| Betaine : glycerol : saccharose           | 4:5:1       | 0.31                   |
| <b>Choline chloride-based</b>             |             |                        |
| Choline chloride : levulinic acid         | 1:2         | 3.55                   |
| Choline chloride : lactic acid : water    | 1:1.8:1     | 0.69                   |
| Choline chloride : lactic acid : water    | 1:2.7:1.5   | 1.92                   |
| Choline chloride : glycerol : saccharose  | 4:5:1       | 0.66                   |
| Choline chloride : citric acid : glycerol | 1:1:1       | 0.60                   |
| Choline chloride : saccharose             | 4:1         | 0.29                   |

|                                             |             |      |
|---------------------------------------------|-------------|------|
| Choline chloride : citric acid              | 1:1         | 0.08 |
| Choline chloride : citric acid              | 2:1         | 0.03 |
| Choline chloride : citric acid              | 3:1         | 0.02 |
| Choline chloride : citric acid              | 1:2         | 0.16 |
| Choline chloride : glycerol                 | 1:2         | 0.14 |
| Choline chloride : glycerol                 | 1:1         | 0.13 |
| Choline chloride : glucose                  | 5:2         | 0.01 |
| Choline chloride : glucose                  | 2:1         | 0.01 |
| Choline chloride : fructose                 | 1:1         | 0.01 |
| Choline chloride : fructose                 | 5:2         | 0.02 |
| <b>Glycerol-based</b>                       |             |      |
| Glycerol : fructose                         | 1:1         | 2.30 |
| Glycerol : tartaric acid                    | 1:1         | 2.03 |
| Glycerol : citric acid                      | 2:1         | 0.70 |
| <b>Lactic acid-based</b>                    |             |      |
| Lactic acid : water : glucose : fructose    | 0.9:0.5:1:1 | 1.83 |
| Lactic acid : water : glucose               | 7.2:4:1     | 0.88 |
| Lactic acid : water : glucose : citric acid | 0.9:0.5:1:1 | 0.42 |
| Lactic acid : water : $\beta$ -alanine      | 0.9:0.5:1   | 0.33 |
| <b>Citric acid-based</b>                    |             |      |
| Citric acid : glucose                       | 1:1         | 1.44 |
| Citric acid : glucose                       | 2:1         | 0.16 |
| Citric acid : saccharose                    | 1:1         | 0.65 |
| Citric acid : $\beta$ -alanine              | 1:1         | 0.35 |
